# A Low Molecular Weight Heparin Inhibits Experimental Metastasis in Mice Independently of the Endothelial Glycocalyx

Geerte L. Van Sluis<sup>1,2,3,4</sup>, Max Nieuwdorp<sup>1</sup>, Pieter W. Kamphuisen<sup>1</sup>, Johan van der Vlag<sup>5</sup>, Cornelis J. F. Van Noorden<sup>3</sup>, C. Arnold Spek<sup>2\*</sup>

**1** Department of Vascular Medicine, Academic Medical Center, Amsterdam, The Netherlands, **2** Center for Experimental and Molecular Medicine, Academic Medical Center, Amsterdam, The Netherlands, **3** Department of Cell Biology and Histology, Academic Medical Center, Amsterdam, The Netherlands, **4** Department Clinical Oncology, Academic Medical Center, Amsterdam, The Netherlands, **5** Nephrology Research Laboratory, Department of Nephrology, Nijmegen Centre for Molecular Life Sciences, Radboud University Nijmegen Medical Centre, Nijmegen, The Netherlands

## Abstract

**Background:** Some low molecular weight heparins (LMWHs) prolong survival of cancer patients and inhibit experimental metastasis. The underlying mechanisms are still not clear but it has been suggested that LMWHs (at least in part) limit metastasis by preventing cancer cell-induced destruction of the endothelial glycocalyx.

**Methodology/Principal Findings:** To prove or refute this hypothesis, we determined the net effects of the endothelial glycocalyx in cancer cell extravasation and we assessed the anti-metastatic effect of a clinically used LMWH in the presence and absence of an intact endothelial glycocalyx. We show that both exogenous enzymatic degradation as well as endogenous genetic modification of the endothelial glycocalyx decreased pulmonary tumor formation in a murine experimental metastasis model. Moreover, LMWH administration significantly reduced the number of pulmonary tumor foci and thus experimental metastasis both in the presence or absence of an intact endothelial glycocalyx.

**Conclusions:** In summary, this paper shows that the net effect of the endothelial glycocalyx enhances experimental metastasis and that a LMWH does not limit experimental metastasis by a process involving the endothelial glycocalyx.

**Citation:** Van Sluis GL, Nieuwdorp M, Kamphuisen PW, van der Vlag J, Van Noorden CJF, et al. (2010) A Low Molecular Weight Heparin Inhibits Experimental Metastasis in Mice Independently of the Endothelial Glycocalyx. PLoS ONE 5(6): e11200. doi:10.1371/journal.pone.0011200

**Editor:** Ludovic Tailleux, Institut Pasteur, France

**Received:** March 8, 2010; **Accepted:** May 31, 2010; **Published:** June 21, 2010

**Copyright:** © 2010 van Sluis et al. This is an open-access article distributed under the terms of the Creative Commons Attribution License, which permits unrestricted use, distribution, and reproduction in any medium, provided the original author and source are credited.

**Funding:** The authors have no support or funding to report.

**Competing Interests:** The authors have declared that no competing interests exist.

\* E-mail: c.a.spek@amc.uva.nl

## Introduction

In experimental animal models and clinical studies it has been well established that some low molecular weight heparins (LMWH) inhibit experimental metastasis and prolong survival [1,2]. Although the underlying mechanisms are only partially understood, it has been suggested that the endothelial glycocalyx may play an important role in the life prolonging effects of LMWH in patients.

The endothelial glycocalyx is a negatively charged, organized network of membranous glycoproteins, proteoglycans and glycosaminoglycans that affects several biological processes with potential importance for cancer cell extravasation. First, the endothelial glycocalyx is essential for vascular barrier function. Its disruption by pro-inflammatory cytokines, including tumor necrosis factor (TNF- $\alpha$ ) and glycocalyx-degrading enzymes such as heparanase and hyaluronidase, leads to increased vascular permeability [3–5]. Second, the glycocalyx has anticoagulant properties and thrombin generation is reduced by the glycocalyx because it stores various natural anticoagulant factors such as antithrombin, protein C and tissue factor pathway inhibitor [6].

Consequently, disruption of the endothelial glycocalyx instantly results in thrombin generation and platelet adhesion [7]. Third, through its diversity in biochemical make-up, the endothelial glycocalyx both prevents and facilitates cell adhesion to the endothelium. The size of the glycocalyx (predominantly its heparan sulphate proteoglycan and hyaluronate composition) exceeds the size of the adhesion molecules (syndecan-1, L- and P-selectin), thereby masking these proteins and preventing adhesion of among others leukocytes [8]. On the other hand, when glycocalyx bound components such as hyaluronic acid are released they may serve as ligands for the CD44 receptor expressed on many cells (including cancer cells). The glycocalyx thus plays an important role in cell adhesion to the vessel wall [9,10]. Fourth, the glycocalyx binds growth factors and extracellular matrix components via its proteoglycan syndecan-1. Moreover, syndecan-1 modulates fibroblast growth factor-2 (FGF-2) and vascular endothelial growth factor (VEGF) activity [11]. The glycocalyx is a sink of growth factors that in general are anti-apoptotic and of VEGF that can increase endothelial permeability [12]. Overall, the endothelial glycocalyx may thus be an important player in several biological processes with potential relevance for cancer cell

metastasis. The relative importance of the particular pro- and anti-metastatic effects of the endothelial glycocalyx *in vivo* remains to be elucidated however.

Interestingly, cancer cells produce enzymes that are known to degrade the endothelial glycocalyx, such as heparanase and hyaluronidase [12–16]. These enzymes consequently influence vascular endothelial barrier integrity, adhesive properties of the endothelial lining, cytokine production and can liberate heparan sulfate-bound growth factors thereby inducing cancer cell extravasation. As heparin, LMWHs and heparin derivatives can abolish the activity or binding of heparanase [17,18] and hyaluronidase [19] by competing with heparan sulphates and hyaluronan [20–22], it has been hypothesized that LMWHs (at least in part) limit cancer progression by restoring cancer cell-induced glycocalyx damage thereby limiting cancer cell extravasation [23].

In the current manuscript, we aimed to assess whether the effect of a LMWH on experimental metastasis depends on restoration of the endothelial glycocalyx. To this end, we first determined the net effect of the endothelial glycocalyx in experimental metastasis. Next, we assessed the effect of a LMWH in the presence or absence of an intact endothelial glycocalyx to determine the contribution of the glycocalyx to the effect of this LMWH on the reduction of experimental metastasis.

## Results and Discussion

To assess the net effect of the endothelial glycocalyx on experimental metastasis, wild type mice were treated with hyaluronidase in order to remove hyaluronan and, in part, heparan sulphates from the endothelial glycocalyx. As it has previously been shown that one hour after hyaluronidase treatment vascular leakage is evident [4], B16F10 melanoma cells were injected intravenously 1h after intravenous hyaluronidase or saline administration. Experimental metastases in the lung were examined 14 days later. As shown in Figure 1, the number of pulmonary tumor foci was significantly reduced by approximately 30% after hyaluronidase treatment as compared to the saline injected control group. Enzymatic degradation of the glycocalyx (at least of its hyaluronan component) thus limits experimental

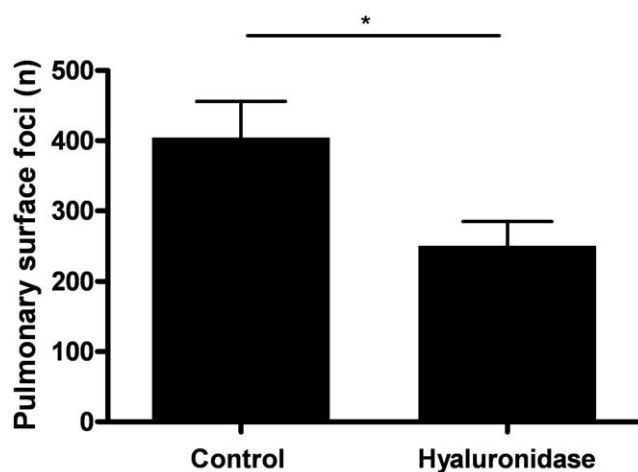

**Figure 1. Effect of hyaluronidase on the number of B16F10 pulmonary tumor foci.** C57Bl/6 mice were treated intravenously with 100U hyaluronidase 1h prior to the administration of  $3.5 \times 10^5$  B16F10 melanoma cells into the lateral tail vein. Mice were sacrificed 14 days after cancer cell injection and the number of tumor foci at the surface of the lungs was determined. Error bars represent means  $\pm$  SEM (n=8); \*, p<0.05. doi:10.1371/journal.pone.0011200.g001

metastasis suggesting that the net effect of the glycocalyx is pro-metastatic. These data imply that hyaluronidase-induced endothelial barrier disruption and consequent increased vascular permeability that would promote cancer cell extravasation is counteracted by the loss of specific adhesion molecules and/or growth factors from the glycocalyx. However, it should be realized that hyaluronidase treatment may not only destroy the endothelial glycocalyx but may also trigger the immune system which would reduce the number of cancer cells in the circulation [24,25]. Furthermore, hyaluronidase increases circulating levels of hyaluronan oligomers which are known to limit cancer progression [10]. In addition, one could argue that systemic hyaluronidase treatment may also target the glycocalyx of cancer cells and this might be particularly relevant because impairment of the glycocalyx makes the cancer cell vulnerable to the immune system [26]. However, circulating hyaluronidase levels at the moment of cancer cell inoculation are rather low due to the short half-life of hyaluronidase (i.e. 2.7 minutes in rat plasma [27], resulting in a circulating level of below 0.0001 U) suggesting that the observed effect is not dependent on destruction of the cancer cell glycocalyx.

To confirm the pro-metastatic effect of the glycocalyx and to exclude “side effects” like acute immunological responses [24,25] and/or increased hyaluronan oligomers of hyaluronidase treatment that may also be responsible for the observed reduction in cancer cell extravasation, we assessed the effect of a genetically impaired glycocalyx on cancer cell extravasation. To this end, syndecan-1 deficient mice were subjected to the experimental metastasis model. Lack of this endothelial glycocalyx proteoglycan disturbs the structure of the glycocalyx by reducing the amount of heparan sulphate moieties. As proteoglycans bidirectionally influence their signaling pathways, it might be expected that the reduced content of heparan sulphate moieties is accompanied by a reduction in hyaluronan content. As shown in Figure 2, when injected intravenously with B16F10 melanoma cells these syndecan-1 deficient mice showed a 3-fold reduced number of pulmonary tumor foci compared to wild type mice. These data show that genetic disruption of heparan sulphate moieties of the glycocalyx is anti-metastatic as well.

As already indicated, the glycocalyx is considered as an integrated and balanced carbohydrate layer in which both hyaluronan and heparan sulfate chains are key structural components. Importantly, our data show that targeting either hyaluronan (enzymatically by hyaluronidase treatment) or the heparan sulphate chains (genetic ablation of syndecan-1) of the glycocalyx leads to reduced experimental metastasis. As these two different interventions have a similar effect on experimental metastasis, our data imply that barrier protective-properties of the glycocalyx are less essential for metastasis than its functions in cancer cell adhesion or growth factor storage [28]. Future experiments are needed however to fully appreciate the role of specific components of the glycocalyx on metastasis and to elucidate the underlying mechanisms.

As mentioned before, some LMWHs protect against cancer progression in experimental animal models and clinical trials, including the B16F10 melanoma model of experimental metastasis. As suggested previously, these LMWHs may inhibit metastasis through competitive binding of heparanase or hyaluronidase thereby protecting the vascular endothelium and its barrier function from disruption caused by these enzymes. To assess whether the inhibitory effect of the administration of a LMWH on cancer progression are dependent on its protective effects on the glycocalyx, we compared the effect of enoxaparin administration on experimental metastasis in syndecan-1 deficient and wild type mice. As shown in Figure 2, enoxaparin injected intravenously at 30 min prior, and 6 and 12 h after cancer cell inoculation decreased the number of pulmonary tumor foci in wild type mice almost

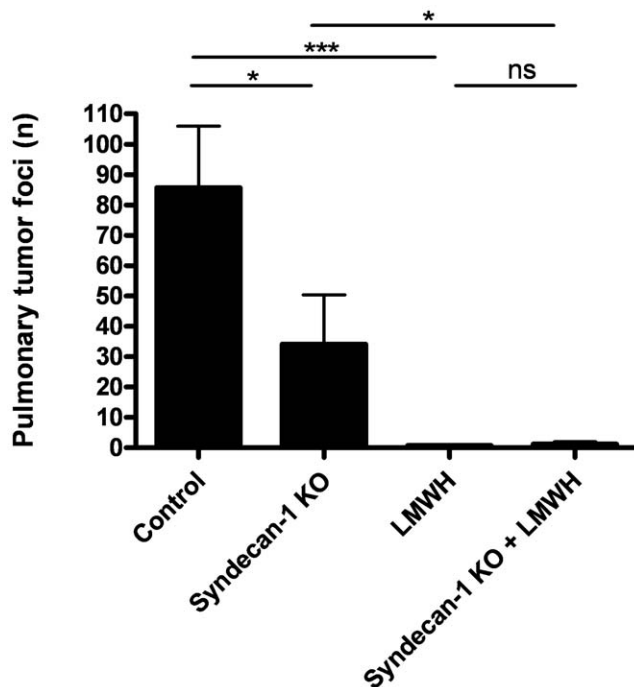

**Figure 2. Pulmonary tumor foci formation in syndecan-1  $-/-$  versus wild type mice with and without treatment with LMWH.** Syndecan-1  $-/-$  and wild type mice were administered  $2.0 \times 10^5$  B16F10 melanoma cells into the lateral tail vein. One group of mice was treated with LMWH (15 mg/kg enoxaparin) prior to the administration of B16F10 melanoma cells and LMWH treatment was repeated after 6, 12 and 24 h. Mice were sacrificed 14 days after cancer cell injection and the number of tumor foci at the surface of the lungs was determined. Error bars represent medians  $\pm$  interquartile range ( $n=8$ ), \*  $p<0.05$ ; \*\*\*  $p<0.001$ . doi:10.1371/journal.pone.0011200.g002

completely. Interestingly, LMWH administration also effectively reduced pulmonary tumor foci formation in syndecan-1 deficient animals ( $p=0.02$ ). These data show that the effect of this particular LMWH on secondary tumor formation is syndecan-1 independent and suggest that the cancer inhibiting effect of LMWHs may not be mediated by restoration of glycocalyx barrier function.

Some aspects of the experimental set-up require further comments. First, a lower amount of cancer cells was injected in the second experiment (Figure 2) in order to achieve lower numbers of pulmonary tumor foci that could be assessed more easily. Consequently, the wild type mice had less pulmonary tumor foci than in Figure 1. Moreover, syndecan-1-deficient mice appeared to be even better protected to secondary tumor formation than mice which received a single dose of hyaluronidase (approximately 80% versus 33% reduction in tumor foci in syndecan-1 deficient and hyaluronidase treated mice, respectively). This may imply that long term irreversible glycocalyx damage is more protective than temporally enzyme-mediated glycocalyx damage.

In conclusion, our data show that targeted interference of either hyaluronan or heparan sulfate limits experimental metastasis suggesting that the net effect of the glycocalyx is pro-metastatic. Moreover, the effect of enoxaparin on cancer progression and cancer cell metastasis is glycocalyx independent.

## Materials and Methods

### Hyaluronidase and heparin

Bovine testicular hyaluronidase (type IV-S; Sigma-Aldrich, St. Louis, MO) dissolved in 0.9% NaCl was administered intrave-

nously in a dose of 100 units per mouse 1h prior to cancer cell inoculation [4]. LMWH (15 mg/kg; enoxaparin, Sanofi-Aventis, Paris, France) was injected 30 min prior to and 6, 12 and 24 h after cancer cell inoculation.

### Cells and cell culture

Murine B16F10 melanoma cells were obtained from the American Type Culture Collection (ATCC; Manassas, VA). Cells were cultured in Dulbecco Modified Eagle Medium (DMEM; Lonza, Verviers, Belgium) supplemented with 10% fetal calf serum (Sigma-Aldrich), 1% penicillin-streptomycin solution and 1% L-glutamine at 37°C as described before [29,30]. Single cell suspensions were prepared from 2 mM EDTA-treated monolayer's which were washed and diluted in phosphate-buffered saline (PBS) prior to counting and inoculation. Cells were stored on ice until administration.

### Animals

Eight to ten week-old C57Bl/6 male mice (Charles River, Maastricht, The Netherlands) were maintained at the animal care facility of the Academic Medical Centre, Amsterdam, The Netherlands according to institutional guidelines. Syndecan-1  $-/-$  male mice on a C57Bl/6 background were housed and bred in the Radboud University Nijmegen Medical Centre and handled as described [31–34]. Animal procedures were carried out in compliance with Institutional Standards for Humane Care and Use of Laboratory Animals. The institutional Animal Care and Use Committee approved all experiments (protocol number DIX101092).

### Experimental pulmonary metastasis model

Cancer cells (suspended in 200  $\mu$ l PBS) were injected into the lateral tail vein as described before [35–37]. In the first experiment,  $3.5 \times 10^5$  cancer cells were administered per mouse, whereas in the second experiment  $2.0 \times 10^5$  cells were used in order to lower the amount of secondary tumor foci for purpose of countability. After 14 days, mice were sacrificed and lungs were prepared as described before [30]. Secondary tumor formation on the surface of the lungs was counted macroscopically in a blinded fashion with respect to the intervention. Experiments were performed with 8 mice per group.

### Statistical analysis

Statistical analysis was carried out in GraphPad Prism version 4.03. Data are expressed as means  $\pm$  SEM or medians with interquartile range. For normally distributed data, significance was assessed with the Student t-test. For not normally distributed data, non-parametric testing was performed using the Mann-Whitney test. Statistical significance was assumed when the p-value was  $<0.05$ .

### Acknowledgments

We kindly acknowledge the carefully performed animal experiments by Joost Daalhuisen and Marieke ten Brink of the Center for Experimental and Molecular Medicine of the Academic Medical Center in Amsterdam. We gratefully acknowledge Dr. M Götte (Medical Center, University of Münster, Münster, Germany) for the syndecan-1 deficient mice. We kindly acknowledge Dr Rops (Radboud University Medical Centre, Nijmegen, the Netherlands) for the breeding and genotyping of the syndecan-1 knock out mice.

### Author Contributions

Conceived and designed the experiments: GvS CAS. Performed the experiments: GvS. Analyzed the data: GvS MN PK CAS. Contributed reagents/materials/analysis tools: JvdV. Wrote the paper: GvS MN PK CJFVN CAS.

## References

- Akl EA, van Doormaal FF, Barba M, Kamath G, Kim SY, et al. (2007) Parenteral anticoagulation for prolonging survival in patients with cancer who have no other indication for anticoagulation. *Cochrane Database Syst Rev*: CD006652.
- Mousa SA, Linhardt R, Francis JL, Amirkhosravi A (2006) Anti-metastatic effect of a non-anticoagulant low-molecular-weight heparin versus the standard low-molecular-weight heparin, enoxaparin. *Thromb Haemost* 96: 816–821.
- Fuster MM, Esko JD (2005) The sweet and sour of cancer: glycans as novel therapeutic targets. *Nat Rev Cancer* 5: 526–542.
- van den Berg BM, Vink H, Spaan JA (2003) The endothelial glycocalyx protects against myocardial edema. *Circ Res* 92: 592–594.
- Nieuwdorp M, Meuwese MC, Vink H, Hoekstra JB, Kastelein JJ, et al. (2005) The endothelial glycocalyx: a potential barrier between health and vascular disease. *Curr Opin Lipidol* 16: 507–511.
- Esmon CT (2003) Inflammation and thrombosis. *J Thromb Haemost* 1: 1343–1348.
- Vink H, Constantinescu AA, Spaan JAE (2000) Oxidized lipoproteins degrade the endothelial surface layer: Implications for platelet-endothelial cell adhesion. *Circulation* 101: 1500–1502.
- Mulivor AW, Lipowsky HH (2002) Role of glycocalyx in leukocyte-endothelial cell adhesion. *Am J Physiol Heart Circ Physiol* 283: H1282–H1291.
- Naor D, Wallach-Daylan SB, Zahalka MA, Sionov RV (2008) Involvement of CD44, a molecule with a thousand faces, in cancer dissemination. *Semin Cancer Biol* 18: 260–267.
- Zeng C, Toole BP, Kinney SD, Kuo JW, Stamenkovic I (1998) Inhibition of tumor growth *in vivo* by hyaluronan oligomers. *Int J Cancer* 77: 396–401.
- Kainulainen V, Nelimarkka L, Järveläinen H, Laato M, Jalkanen M, et al. (2006) Suppression of Syndecan-1 expression in endothelial cells by tumor necrosis factor- $\alpha$ . *J Biol Chem* 271: 18759–18766.
- Elkin M, Ilan N, Ishai-Michaeli R, Freidmann Y, Papo O, et al. (2001) Heparanase as mediator of angiogenesis: mode of action. *FASEB J* 15: 1661–1663.
- Udabage L, Brownlee GR, Nilsson SK, Brown TJ (2005) The over-expression of HAS2, Hyal-2 and CD44 is implicated in the invasiveness of breast cancer. *Exp Cell Res* 310: 205–217.
- Vlodavsky I, Ilan N, Nadir Y, Brenner B, Katz BZ, et al. (2007) Heparanase, heparin and the coagulation system in cancer progression. *Thromb Res* 120 (Suppl 2): S112–S120.
- Liu D, Pearlman E, Diaconu E, Guo K, Mori H, et al. (1996) Expression of hyaluronidase by tumor cells induces angiogenesis *in vivo*. *Proc Natl Acad Sci U S A* 93: 7832–7837.
- Zetser A, Bashenko Y, Edovitsky E, Levy-Adam F, Vlodavsky I, et al. (2006) Heparanase Induces Vascular Endothelial Growth Factor Expression: Correlation with p38 Phosphorylation Levels and Src Activation. *Cancer Res* 66: 1455–1463.
- Irimura T, Nakajima M, Nicolson GL (1986) Chemically modified heparins as inhibitors of heparan sulfate specific endo-beta-glucuronidase (heparanase) of metastatic melanoma cells. *Biochemistry* 25: 5322–5328.
- Vlodavsky I, Mohsen M, Lider O, Svahn CM, Ekre HP, et al. (1994) Inhibition of tumor metastasis by heparanase inhibiting species of heparin. *Inv Metastasis* 14: 290–302.
- Maksimenko AV, Petrova ML, Tischenko EG, Schechilina YV (2001) Chemical modification of hyaluronidase regulates its inhibition by heparin. *Eur J Pharm Biopharm* 51: 33–38.
- Hostettler N, Naggi A, Torri G, Ishai-Michaeli R, Casu B, et al. (2007) P-selectin- and heparanase-dependent antimetastatic activity of non-anticoagulant heparins. *FASEB J* 21: 3562–3572.
- Maksimenko AV, Schechilina YV, Tischenko EG (2003) Role of the glycosaminoglycan microenvironment of hyaluronidase in regulation of its endoglycosidase activity. *Biochemistry (Mosc)* 68: 862–868.
- Muckenschabel I, Bernhardt G, Spruss T, Buschauer A (1998) Pharmacokinetics and tissue distribution of bovine testicular hyaluronidase and vinblastine in mice: an attempt to optimize the mode of adjuvant hyaluronidase administration in cancer chemotherapy. *Cancer Lett* 131: 71–784.
- Niers TM, Klerk CP, DiNisio M, Van Noorden CJ, Büller HR, et al. (2007) Mechanisms of heparin induced anti-cancer activity in experimental cancer models. *Crit Rev Oncol Hematol* 61: 195–207.
- Mohamadzadeh M, DeGrendele H, Arizpe H, Estess P, Siegelman M (1998) Proinflammatory stimuli regulate endothelial hyaluronan expression and CD44/HA-dependent primary adhesion. *J Clin Invest* 101: 97–108.
- Bishop JR, Schuksz M, Esko JD (2007) Heparan sulphate proteoglycans fine-tune mammalian physiology. *Nature* 446: 1030–1037.
- Mythreya K, Blobel GC (2009) Proteoglycan signaling co-receptors: roles in cell adhesion, migration and invasion. *Cell Signal* 21: 1548–1558.
- Earnshaw JS, Curtis CG, Powell GM, Dodgson KS, Olavesen AH, et al. (1985) *Biochem Pharmacol* 34: 2199–2203. The fate of intravenously administered highly purified bovine testicular hyaluronidase (Hyalosidase) in the rat.
- Yang Y, MacLeod V, Dai Y, Khotskaya-Sample Y, Shriver Z, et al. (2007) The syndecan-1 heparan sulfate proteoglycan is a viable target for myeloma therapy. *Blood* 110: 2041–2048.
- Niers TM, Bruggemann LW, van Sluis GL, Liu RD, Versteeg HH, et al. (2009) Long-term thrombin inhibition promotes cancer cell extravasation in a mouse model of experimental metastasis. *J Thromb Haemost* 7: 1595–1597.
- VVan Sluis GL, Niers TM, Esmon CT, Tigchelaar W, Richel DJ, et al. (2009) Endogenous activated protein C limits cancer cell extravasation through sphingosine-1-phosphate receptor 1-mediated vascular endothelial barrier enhancement. *Blood* 114: 1968–1973.
- Alexander CM, Reichsman F, Hinkes MT, Linccum J, Becker KA, et al. (2000) Syndecan-1 is required for Wnt-1-induced mammary tumorigenesis in mice. *Nat Genet* 25: 329–332.
- Rops AL, Gotte M, Baselmans MH, van den Hoven MJ, Steenbergen EJ, et al. (2007) Syndecan-1 deficiency aggravates anti-glomerular basement membrane nephritis. *Kidney Int* 72: 1204–1215.
- Stepp MA, Gibson HE, Gala PH, Iglesia DD, Pajoohesh-Ganji A, et al. (2002) Defects in keratinocyte activation during wound healing in the syndecan-1-deficient mouse. *J Cell Sci* 115: 4517–4531.
- Kharabi Masouleh B, Ten Dam GB, Wild MK, Seeliger R, van der Vlag J, et al. (2009) Role of the Heparan Sulfate Proteoglycan Syndecan-1 (CD138) in Delayed-Type Hypersensitivity. *J Immunol* 182: 4985–4993.
- Bruggemann LW, Versteeg HH, Reitsma PH, Spek CA (2008) High factor VIIa levels do not promote tumor metastasis. *Thromb Haemost* 99: 787–788.
- Bruggemann LW, Versteeg HH, Niers TM, Reitsma PH, Spek CA (2008) Experimental melanoma metastasis in lungs of mice with congenital coagulation disorders. *J Cell Mol Med* 12: 2622–2627.
- Fidler IJ (2003) The pathogenesis of cancer metastasis: the ‘seed and soil’ hypothesis revisited. *Nat Rev Cancer* 3: 453–458.
